# Supplementary material
Source: HighWire-hosted journal article supplement (https://bmjopen.bmj.com/content/8/10/e024264)
Supplement: inline-supplementary-material-1 [file inline-supplementary-material-1.pdf]

## Lightbody et al. Structured Judgment Review *pro forma*. See reference 18 in manuscript.

### Problems and Harms

The first-pass analysis of patient records will identify problem types (see below). The second-pass analysis will decide if there was evidence of **actual harm** to the patient in any aspect of their overall care.

If you did identify **problems**, please identify which problem type(s) from the selection below and then indicate whether it led to any **harm(s)**.

Harm can happen in relation to **over treatment** (commission; treatments or investigations where benefits are outweighed by detriments) or **under treatment** (omission of essential treatment e.g. symptom control / palliation) nearing the end of life.

Please identify **all** that relate to the case.

### Problem types

#### 1A. Problem in assessment, investigation or diagnosis (e.g. arterial blood gas sampling or CT scans

that did not change management): Yes (1) No (2)

1A ☐

1B Did the problem lead to non-beneficial intervention? Yes (1) No (2) Possibly (3)

1B ☐

1C Did the problem lead to harm? Yes (1) No (2) Possibly (3)

1C ☐

Comments

#### 2A. Problem with medication / IV fluids / electrolytes / oxygen (e.g. non-beneficial drugs continued,

inadequate analgesia): Yes (1) No (2)

2A ☐

2B Did the problem lead to non-beneficial intervention? Yes (1) No (2) Possibly (3)

2B ☐

2C Did the problem lead to harm? Yes (1) No (2) Possibly (3)

2C ☐

Comments

#### 3A. Problem related to treatment and management plan (e.g. not recognising that patient was dying,

inappropriate escalation of level of care): Yes (1) No (2)

3A ☐

3B Did the problem lead to non-beneficial intervention? Yes (1) No (2) Possibly (3)

3B ☐

3C Did the problem lead to harm? Yes (1) No (2) Possibly (3)

3C ☐

Comments

**4A. Problem with palliative or end-of-life care?** (e.g. physical or psychological distress not addressed)

Yes (1) No (2)

4A ☐

**4B** Did the problem lead to harm? Yes (1) No (2) Possibly (3)

4B ☐

Comments

**5A. Problem related to operation/invasive procedure:** Yes (1) No (2)

5A ☐

**5B** Did the problem lead to harm? Yes (1) No (2) Possibly (3)

5B ☐

Comments

**6A. Problem in clinical monitoring** (including failure to plan, or to recognise and respond to changes):

Yes (1) No (2)

6A ☐

**6B** Did the problem lead to harm? Yes (1) No (2) Possibly (3)

6B ☐

Comments

**7A. Problem in resuscitation following a cardiac or respiratory arrest** (including CPR carried out with no chance of successful outcome): Yes (1) No (2)

7A ☐

**7B** Did the problem lead to harm? Yes (1) No (2) Possibly (3)

7B ☐

Comments

**8. Problem of any other type not fitting the categories above** Yes (1) No (2) 8A ☐

Please describe the problem.....

**8B** Did the problem lead to harm? Yes (1) No (2) Possibly (3)

8B ☐

Comments
